# Supplementary material for: Differential connectivity of splicing activators and repressors to the human spliceosome
Source: PubMed Central journal article supplement (PMC4502471; doi:10.1186/s13059-015-0682-5), 2015-06-06
Supplement: 13059_2015_682_MOESM7_ESM.pdf [file 13059_2015_682_MOESM7_ESM.pdf]

**Table S4: Topological metrics of the PS-network and deterministic network**

| Topological measures     | $P_{(i)} \geq 0.001$ | $P_{(i)} \geq 0.01$ | $P_{(i)} \geq 0.1$ | $P_{(i)} \geq 0.5$ | $P_{(i)} \geq 0.9$ | DET  |
|--------------------------|----------------------|---------------------|--------------------|--------------------|--------------------|------|
| Diameter                 | 4                    | 5                   | 6                  | 8                  | 10                 | 7    |
| Modularity               | 0.03                 | 0.05                | 0.17               | 0.23               | 0.49               | 0.42 |
| Av. shortest path length | 1.21                 | 1.88                | 2.33               | 2.70               | 3.74               | 3.26 |
| Density                  | 0.4                  | 0.24                | 0.09               | 0.06               | 0.02               | 0.03 |
| Centralization           | 0.42                 | 0.39                | 0.28               | 0.21               | 0.09               | 0.09 |
