# Supplementary material for: Differential connectivity of splicing activators and repressors to the human spliceosome
Source: PubMed Central journal article supplement (PMC4502471; doi:10.1186/s13059-015-0682-5), 2015-06-06
Supplement: 13059_2015_682_MOESM9_ESM.pdf [file 13059_2015_682_MOESM9_ESM.pdf]

**Table S6: Involvement of high-connectivity spliceosomal proteins in human disease**

| <b>Protein</b> | <b>Description</b>                                                                                                                                                                                       | <b>PMID</b> |
|----------------|----------------------------------------------------------------------------------------------------------------------------------------------------------------------------------------------------------|-------------|
| SRSF1          | Loss of an SRSF1-dependent exonic splicing enhancer leads to downregulation of the SMN1 gene and therefore to Spinal Muscular Atrophy.                                                                   | 16385450    |
|                | Splicing factor SRSF1 is upregulated in various human tumors, in part due to amplification of its gene.                                                                                                  | 17310252    |
| SRSF3          | Increased SRSF3 expression in tumor cells is a critical step for tumor initiation, progression, and maintenance.                                                                                         | 21179588    |
|                | Expression of SRSF3 is associated with malignancy of ovarian tumors but not with stage of invasive epithelial ovarian cancer.                                                                            | 20856201    |
| hnRNPD         | hnRNPD proteins are major components of messenger RNA stability complexes which form a novel macromolecular target structure for autoantibodies in rheumatic autoimmune diseases.                        | 18240226    |
| hnRNPF         | High levels of hnRNPF are present in premalignant and malignant stages of colorectal cancer, reflecting a role for this protein early in colorectal tumorigenesis.                                       | 16424007    |
| hnRNPK         | Alternative isoform of hnRNPK found in colonic tumor and surrounding mucosa. It is the first example of an RNA editing event in cancer and its surrounding tissue.                                       | 16404425    |
| RBM10          | Massively parallel sequencing of X chromosome exons show that TARP syndrome is caused by mutations in the RBM10 gene.                                                                                    | 20451169    |
| U2AF1          | U2AF1 mutations are frequent in chronic myelomonocytic leukemia and advanced forms of MDS. U2AF1 mutations are predictive for shorter survival.                                                          | 22323480    |
|                | A missense mutation affecting the serine at codon 34 in U2AF1 was recurrently present in 13 out of 150 (8.7%) subjects with de novo MDS. Suggestive evidence of an increased risk of progression to AML. | 22158538    |
|                | A misspliced form of the cholecystokinin-B/gastrin receptor in pancreatic carcinoma: role of reduced cellular U2AF35 and a suboptimal 3'-splicing site leading to retention of the fourth intron.        | 11830556    |
| SF3B2          | SF3B2 is a biomarker of squamous cell carcinoma.                                                                                                                                                         | 18973137    |
