# Supplementary material for: Differential connectivity of splicing activators and repressors to the human spliceosome
Source: PubMed Central journal article supplement (PMC4502471; doi:10.1186/s13059-015-0682-5), 2015-06-06
Supplement: 13059_2015_682_MOESM16_ESM.pdf [file 13059_2015_682_MOESM16_ESM.pdf]

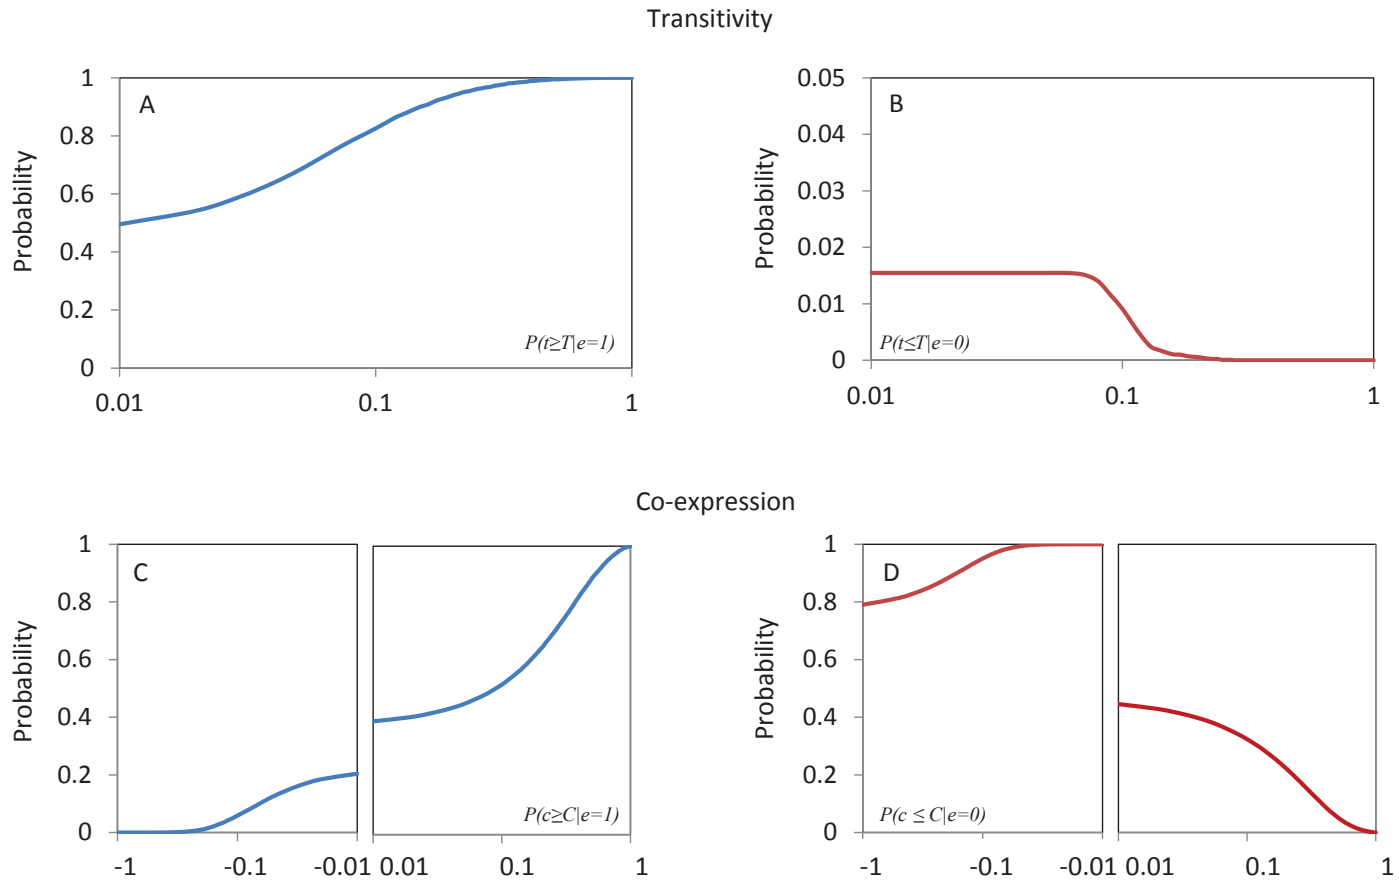

Figure S8
