# Supplementary material for: Differential connectivity of splicing activators and repressors to the human spliceosome
Source: PubMed Central journal article supplement (PMC4502471; doi:10.1186/s13059-015-0682-5), 2015-06-06
Supplement: 13059_2015_682_MOESM17_ESM.pdf [file 13059_2015_682_MOESM17_ESM.pdf]

Table S8: Number of significant peptides detected by MASCOT

| SFs     | Dox | Nuc | Run1 total | Run2 total | Run1 uniq | Run2 uniq | overlap | %overlap |
|---------|-----|-----|------------|------------|-----------|-----------|---------|----------|
| hnRNPA1 | no  | no  | 463        | 116        | 390       | 43        | 73      | 16.86    |
|         |     | yes | 289        | 142        | 201       | 54        | 88      | 34.51    |
|         | yes | no  | 474        | 250        | 288       | 64        | 186     | 52.84    |
|         |     | yes | 320        | 209        | 179       | 68        | 141     | 57.09    |
| SRSF1   | no  | no  | 194        | 458        | 107       | 371       | 87      | 18.20    |
|         |     | yes | 548        | 415        | 314       | 181       | 234     | 47.27    |
|         | yes | no  | 276        | 499        | 105       | 328       | 171     | 39.49    |
|         |     | yes | 609        | 547        | 293       | 231       | 316     | 60.31    |
